# Supplementary material for: Designing a Molecularly Imprinted Polymer Sensor for Sensitive and Selective Detection of the Prostate Cancer Drug Abiraterone Acetate
Source: Research Square preprint supplement (doi:10.21203/rs.3.rs-7774003/v1), 2025-10-27
Supplement: Supplementary file 1 [file 4d1db4dd2a84b0dcfbde7c76.docx]

**SUPPLEMENTARY MATERIALS**

**Designing a Molecularly Imprinted Polymer Sensor for Sensitive and Selective Detection of the Prostate Cancer Drug Abiraterone Acetate**

Abdullah Al Faysal1, Taner Erdoğan2, and Ayşegül Gölcü1*

1Istanbul Technical University, Faculty of Sciences and Letters, Department of Chemistry, Maslak, Istanbul, Türkiye.

2Kocaeli University, Kocaeli Vocational School, Department of Chemistry and Chemical Processing Technologies, Kocaeli, Türkiye

**Figure S1.** The plots of ΔIp1 values versus (A) monomer ratio, (B) drop volume, (C) photopolymerization time, (D) removal solution, (E) removal time, and ΔIp2values versus (F) rebinding time. Conditions: potential scan range, −0.2 V to +0.6 V; scan rate, 0.001587 V/s; step potential 8 mV; modulation amplitude 50 mV; modulation time 0.05 s, interval time 0.5 s.

**Figure S2.** Results of the PP-MIP(AA)/GCE sensor imprinting factor analysis (5 mM [Fe(CN)6]3−/4− solution was used for all studies).

**Figure S3.** The findings of the PP-MIP(AA)/GCE sensor with 5 ×10-12 M AA in the presence of interfering substances (5 mM [Fe(CN)6]3−/4− solution was used for all studies).


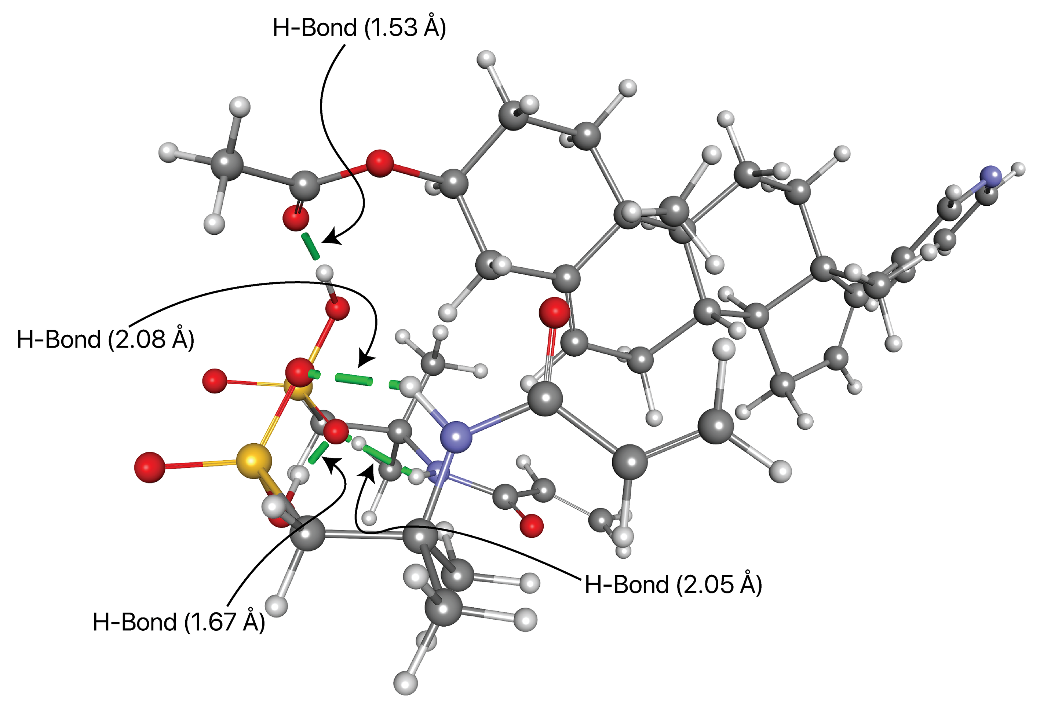


**Figure S4.** Template-monomer interactions in AA-AMPS (1:2) complex.

**Table S1**. The developed sensor's specificity for AA detection.

|  | **PP-MIP(AA)/GCE** | | **NIP** | |  |
| --- | --- | --- | --- | --- | --- |
|  | **ΔІ2/μА** | **k(MIP)** | **ΔІ2/μА** | **k(NIP)** | **k'(MIP/NIP)** |
| **AA** | 67.67 | - | 23.14 | - | - |
| **Enzalutamide** | 30.74 | 2.20 | 25.83 | 0.90 | 2.46 |
| **Darolutamide** | 28.61 | 2.37 | 26.63 | 0.87 | 2.72 |
| **Olaparib** | 35.11 | 1.93 | 26.91 | 0.86 | 2.24 |
| **Niraparib** | 32.04 | 2.11 | 26.47 | 0.87 | 2.42 |

**Table S2.**  The designed sensor's selectivity for AA detection.

| **Interferent** | **Recovery of AA (%)** | **RSD (%)*** |
| --- | --- | --- |
| **KNO3** | 98.72 | 0.76 |
| **Na2SO4** | 102.09 | 0.50 |
| **MgCl2** | 99.88 | 0.76 |
| **Dopamine** | 98.05 | 0.37 |
| **Paracetamol** | 101.06 | 0.96 |
| **Uric acid** | 100.06 | 0.81 |
| **Ascorbic acid** | 99.15 | 0.69 |

*Each value is the mean of three experiments.

**Table S3.** The calculated binding energies.

| **AA-AMPS Ratio** | **Binding Energy (kJ/mol)** |
| --- | --- |
| 1:1 | -24.03 |
| 1:2 | -42.32 |
| 1:3 | -34.62 |
| 1:4 | -71.07 |
| 1:5 | -512.08 |
